# Supplementary material for: Concentric ring-banded spherulites of six-arm star-shaped poly(ε-caprolactone) via subcritical CO2
Source: Royal Society of Chemistry journal article supplement (doi:10.1039/c3ra47503d), 2014-01-01
Supplement: c3ra47503d.pdf [file c3ra47503d.pdf]

**SUPPORTING INFORMATION:**

**Concentric Ring-banded Spherulites of Six-arm Star-shaped Poly  
( $\epsilon$ -caprolactone) via Subcritical CO<sub>2</sub>**

Yifan Zhang, Xia Liao,\* Xianglin Luo, Suilin Liu, Qi Yang, Guangxian Li\*

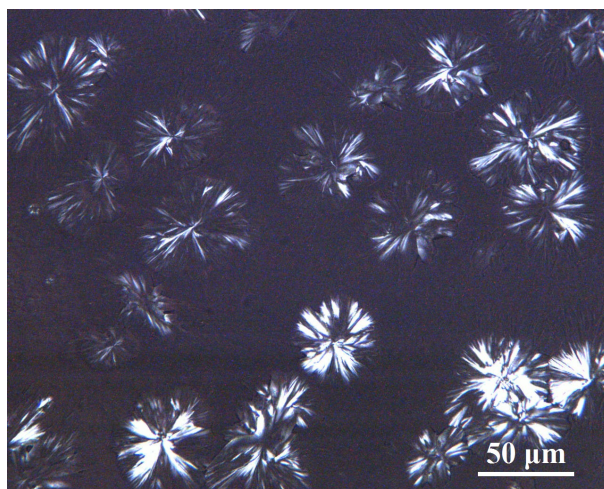

*Figure S1.* PCL treated with CO<sub>2</sub> at 4 MPa and 28 °C for 4 h and subsequently quenched to ambient pressure in 7 s.

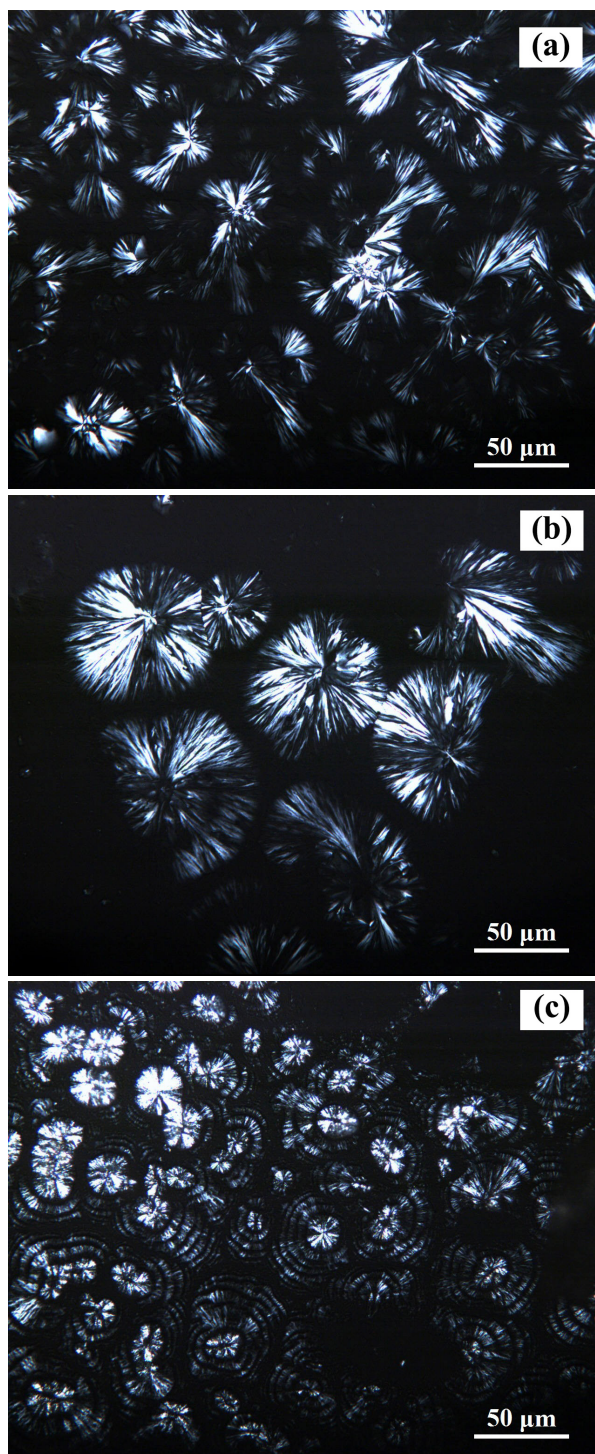

*Figure S2.* PCL samples were treated with CO<sub>2</sub> at 28 °C for 4 h at various pressures: (a) 1 MPa; (b) 2 MPa; (c) 8 MPa.
